# Supplementary material for: NPM3 as a novel oncogenic factor and poor prognostic marker contributes to cell proliferation and migration in lung adenocarcinoma
Source: PubMed Central journal article supplement (PMC10230701; doi:10.1186/s41065-023-00289-6), 2023-05-31

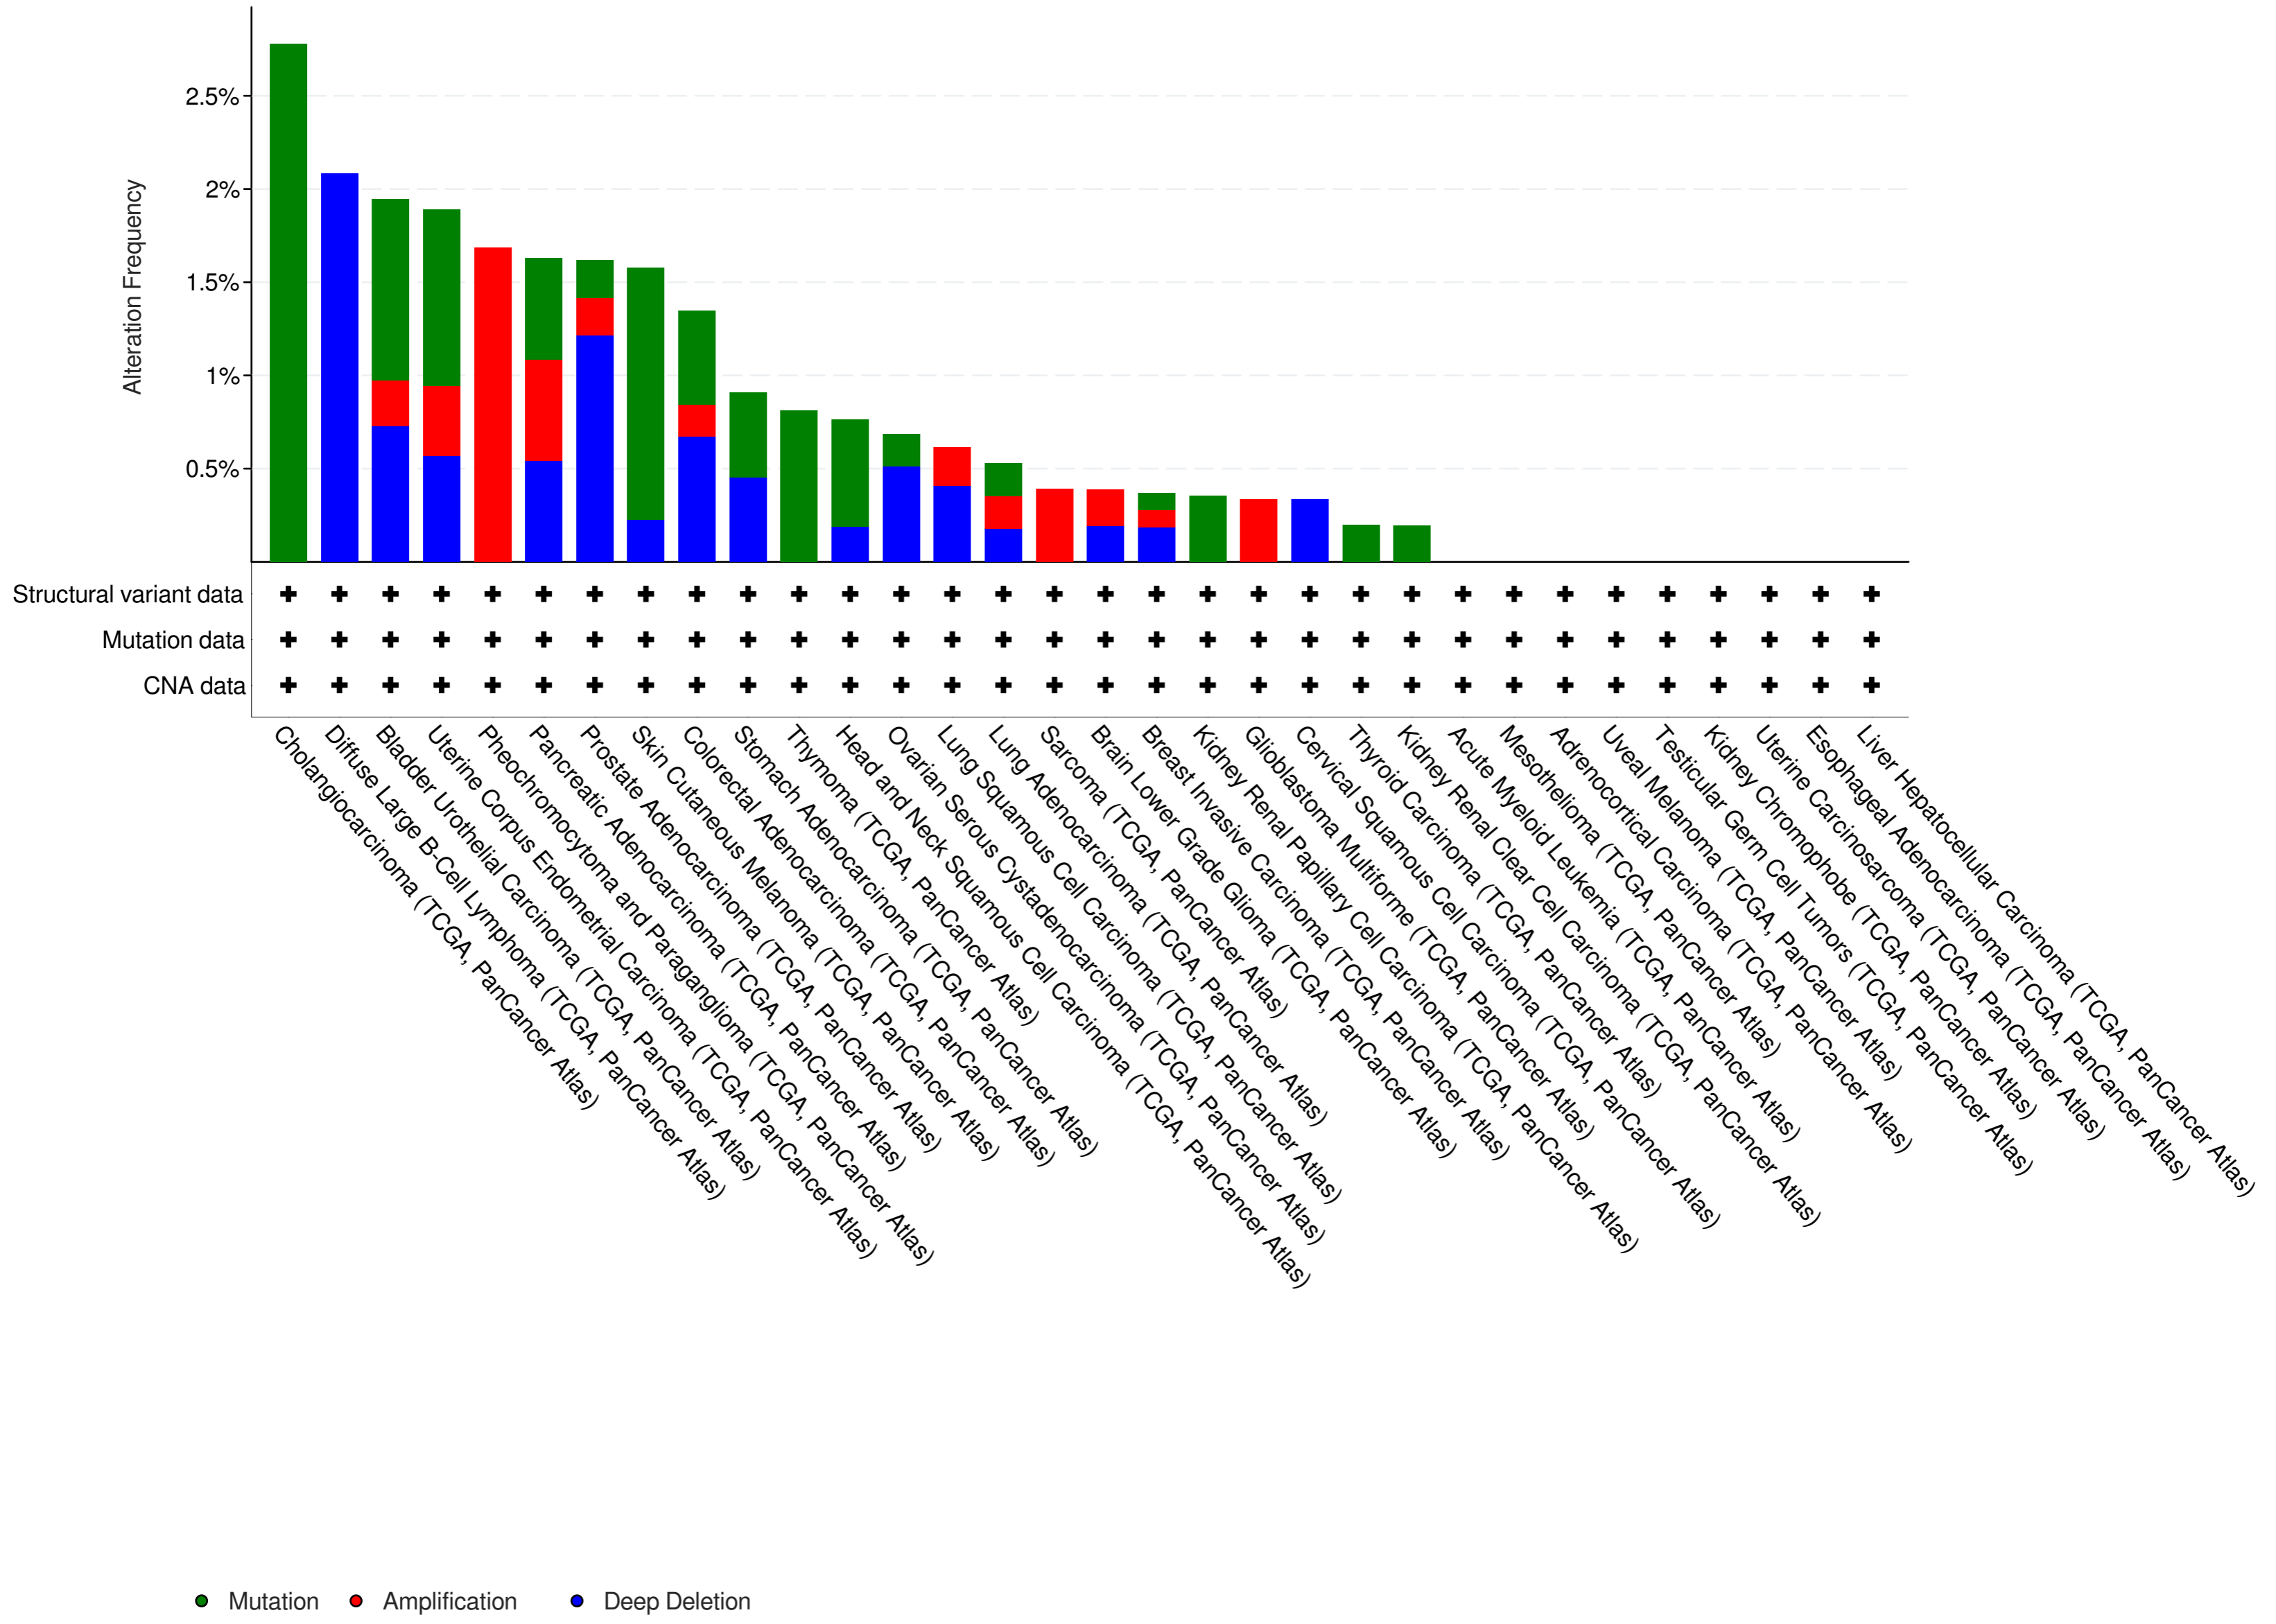

Supplement: 41065_2023_289_MOESM2_ESM.pdf [file 41065_2023_289_MOESM2_ESM.pdf]
